# Supplementary material for: ZEB2 controls kidney stromal progenitor differentiation and inhibits abnormal myofibroblast expansion and kidney fibrosis
Source: PubMed Central journal article supplement (PMC9870089; doi:10.1172/jci.insight.158418), 2023-01-10
Supplement: jciinsight-8-158418-s130.pdf [file jciinsight-8-158418-s130.pdf]

## Supplementary Data

### ZEB2 controls kidney stromal progenitor differentiation and inhibits abnormal myofibroblast expansion and kidney fibrosis

Sudhir Kumar, Xueping Fan, Hila Milo Rasouly, Richa Sharma, David J. Salant, Weining Lu\*

### Supplementary Figures and figure legends

#### Supplementary Figure 1

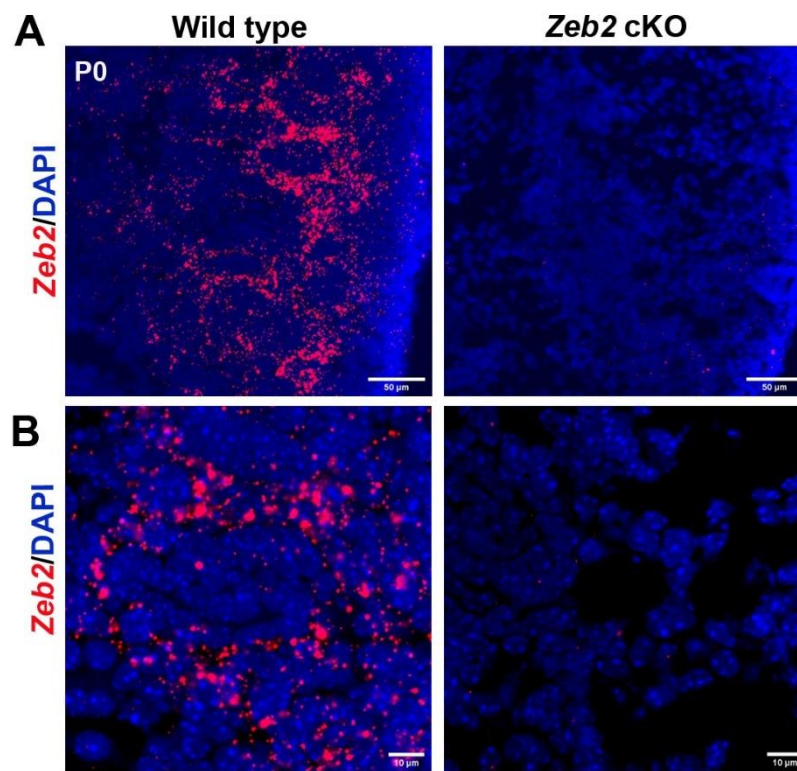

**Supplementary Figure 1:** Analysis of *Zeb2* expression in *Zeb2* cKO mice by RNAscope in situ hybridization. In wild type mice, *Zeb2* mRNA is expressed in the interstitial cells, but it is absent in *Zeb2* cKO mice. DAPI (blue) labels cell nuclei. Scale bar is 50 for panel A and 10 μm for panel B.

## Supplementary Figure 2

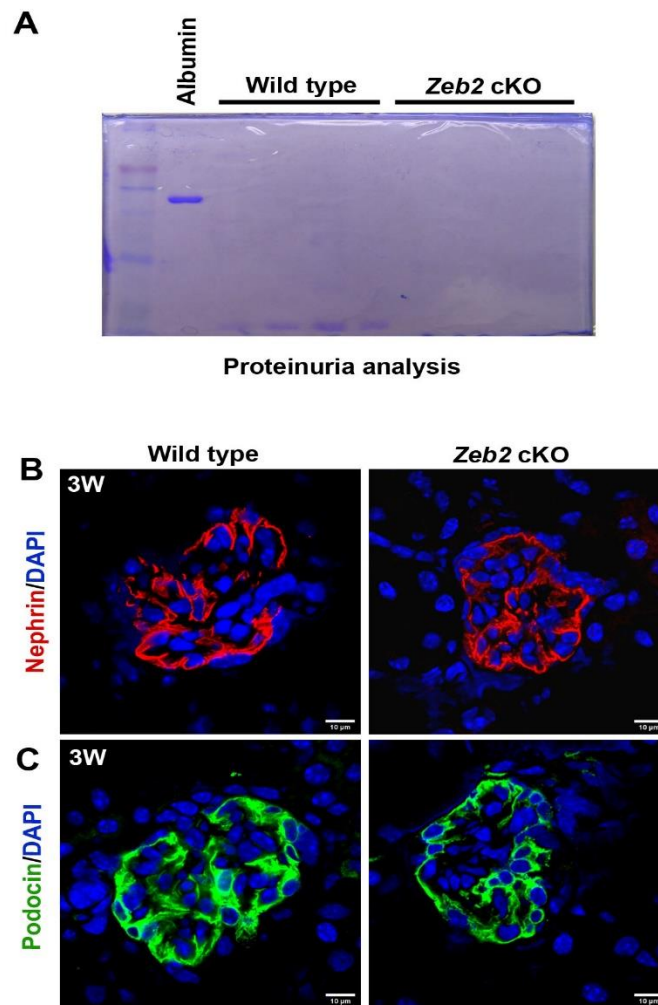

**Supplementary Figure 2: No proteinuria and podocyte defects are observed in 3-week-old *Zeb2* cKO mice.** (A) *Zeb2* cKO mice did not develop proteinuria as compared to wild type littermate controls. Albuminuria was examined by sodium dodecyl sulphate–polyacrylamide gel electrophoresis (SDS-PAGE) and Coomassie blue staining. N = 3 per group. Albumin used as control. (B, C) There was no change in nephrin and podocin expression in *Zeb2* cKO mouse kidneys as compared to wild type mice. Scale bar is 10  $\mu$ m for panels B and C.

Supplementary Figure 3

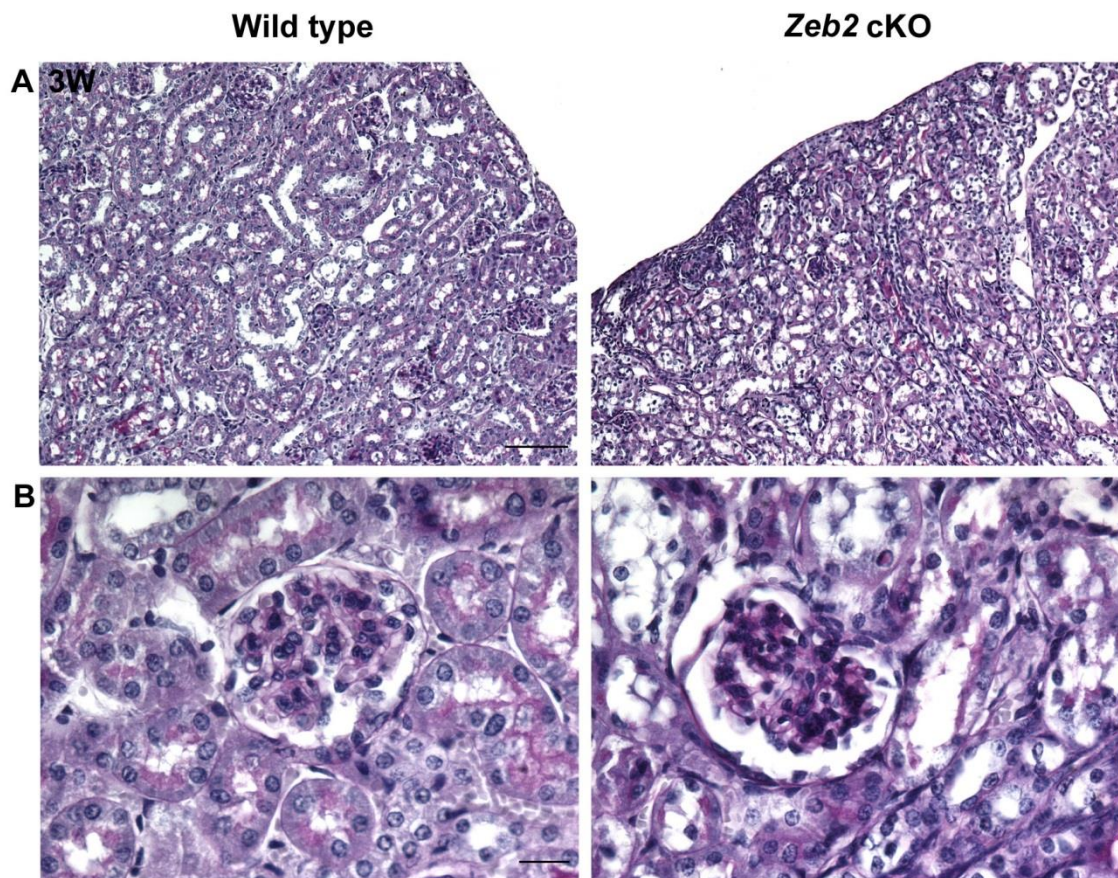

**Supplementary Figure 3: Loss of ZEB2 in FOXD1<sup>+</sup> stromal progenitors did not cause glomerulocystic disease.** PAS staining show relative normal glomerular morphology in 3-week-old *Zeb2* cKO kidney as compared to their wild type littermate controls. Scale bar is 100  $\mu$ m for panel A and 20  $\mu$ m for panel B. n = 5 per group.

## Supplementary Tables

**Supplementary Table 1: Cell specific markers used in this study**

| <b>Protein Name</b> | <b>Cell specific marker</b>                   |
|---------------------|-----------------------------------------------|
| FOXD1               | Kidney stromal progenitor                     |
| PDGFR $\beta$       | Stromal cell/resident fibroblast and pericyte |
| $\alpha$ -SMA       | Myofibroblast, VSMC                           |
| Vimentin            | Myofibroblast, VSMC                           |
| CSPG4 (NG2)         | VSMC and mesangial cell/pericyte              |
| Desmin              | VSMC and mesangial cell/pericyte              |
| NT5E/CD73           | Mesenchymal cell/Resident fibroblast          |
| GLI1                | Mesenchymal cell/pericyte                     |
| Meis1/2/3           | Kidney stromal cell                           |
| CDKN1C              | Kidney stromal Cell                           |
| Nidogen-1           | Basement membrane                             |
| SIX2                | Nephron progenitor                            |
| WT1                 | Nephron progenitor                            |
| JAG1                | Developing proximal tubule                    |

VSMC: vascular smooth muscle cells

**Supplementary Table 2: Primary antibodies used in this study**

| <b>Protein</b> | <b>Catalog #</b> | <b>Species</b> | <b>Manufacturer</b>          | <b>Application</b><br>(dilution) |
|----------------|------------------|----------------|------------------------------|----------------------------------|
| ZEB2           | HPA003456        | Rabbit         | Sigma-Aldrich USA            | IF (1:100)                       |
| FOXD1          | sc-47585         | Goat           | Santa Cruz Biotechnology USA | IF (1:100)                       |
| Desmin         | MA5-13259        | Mouse          | ThermoFisher Scientific USA  | IF (1:20)                        |
| PDGFR $\beta$  | sc-432           | Rabbit         | Santa Cruz Biotechnology USA | IF (1:100)                       |
| PDGFR $\beta$  | APB5             | Rat            | ThermoFisher Scientific USA  | IF (1:100)                       |
| CSPG4          | AB5320           | Rabbit         | Sigma-Aldrich USA            | IF (1:200)                       |
| PECAM1         | 550274           | Rat            | BD Biosciences USA           | IF (1:100)                       |
| $\alpha$ -SMA  | A2547            | Mouse          | Sigma-Aldrich USA            | IF (1:200),<br>WB (1:1000)       |
| $\alpha$ -SMA  | ab5694           | Rabbit         | Abcam USA                    | IF (1:100)                       |
| Vimentin       | sc-6260          | Mouse          | Santa Cruz Biotechnology USA | IF (1:50),<br>WB (1:1000)        |
| MEIS1/2/3      | 39096            | Mouse          | Active Motif USA             | IF (1:200)                       |
| CDKN1C         | sc-8298          | Rabbit         | Santa Cruz Biotechnology USA | IF (1:50)                        |
| Nidogen-1      | NBP1-97701       | Rat            | Novus Biologicals USA        | IF (1:100)                       |
| GLI1           | UM870063         | Mouse          | OriGene Technologies USA     | IF (1:50)                        |
| CD73           | 550738           | Rat            | BD Biosciences USA           | IF (1:100)                       |
| SIX2           | 11562-1-AP       | Rabbit         | Proteintech USA              | IF (1:400)                       |
| WT1            | ab89901          | Rabbit         | Abcam USA                    | IF (1:100)                       |
| JAG1           | sc-8303          | Rabbit         | Santa Cruz Biotechnology USA | IF (1:50)                        |
| Nephrin        | AF3159           | Goat           | R&D systems USA              | IF (1:50)                        |

|                |           |        |                               |                            |
|----------------|-----------|--------|-------------------------------|----------------------------|
| LTL            | FL-1321   | Plant  | Vector Labs USA               | IF (1:200)                 |
| Megalin        | sc-16478  | Goat   | Santa Cruz Biotechnology USA  | IF (1:50)                  |
| UMOD           | MAB5175   | Rat    | R&D systems USA               | IF (1:50)                  |
| collagen 1     | ab21286   | Rabbit | Abcam USA                     | IF (1:50),<br>WB (1:1000)  |
| SMAD4          | ABE21     | Rabbit | Sigma-Aldrich USA             | IF (1:400),<br>WB (1:1000) |
| P-SMAD3        | ab52903   | Rabbit | Abcam USA                     | IF (1:300)                 |
| P-SMAD158      | 13820     | Rabbit | Cell Signaling Technology USA | IF (1:100)                 |
| $\beta$ -actin | MA5-15739 | Mouse  | ThermoFisher Scientific, USA  | WB (1:1000)                |
| AXIN2          | AB32197   | Rabbit | Cell Signaling Technology USA | IF (1:100)                 |
| Podocin        | Ab50339   | Rabbit | Abcam USA                     | IF (1:500)                 |
